# Supplementary material for: Diverse motif ensembles specify non-redundant DNA binding activities of AP-1 family members in macrophages
Source: PubMed Central journal article supplement (PMC6345992; doi:10.1038/s41467-018-08236-0), 2019-01-24
Supplement: 41467_2018_8236_MOESM1_ESM.pdf [file 41467_2018_8236_MOESM1_ESM.pdf]

# 1 Supplementary Figures

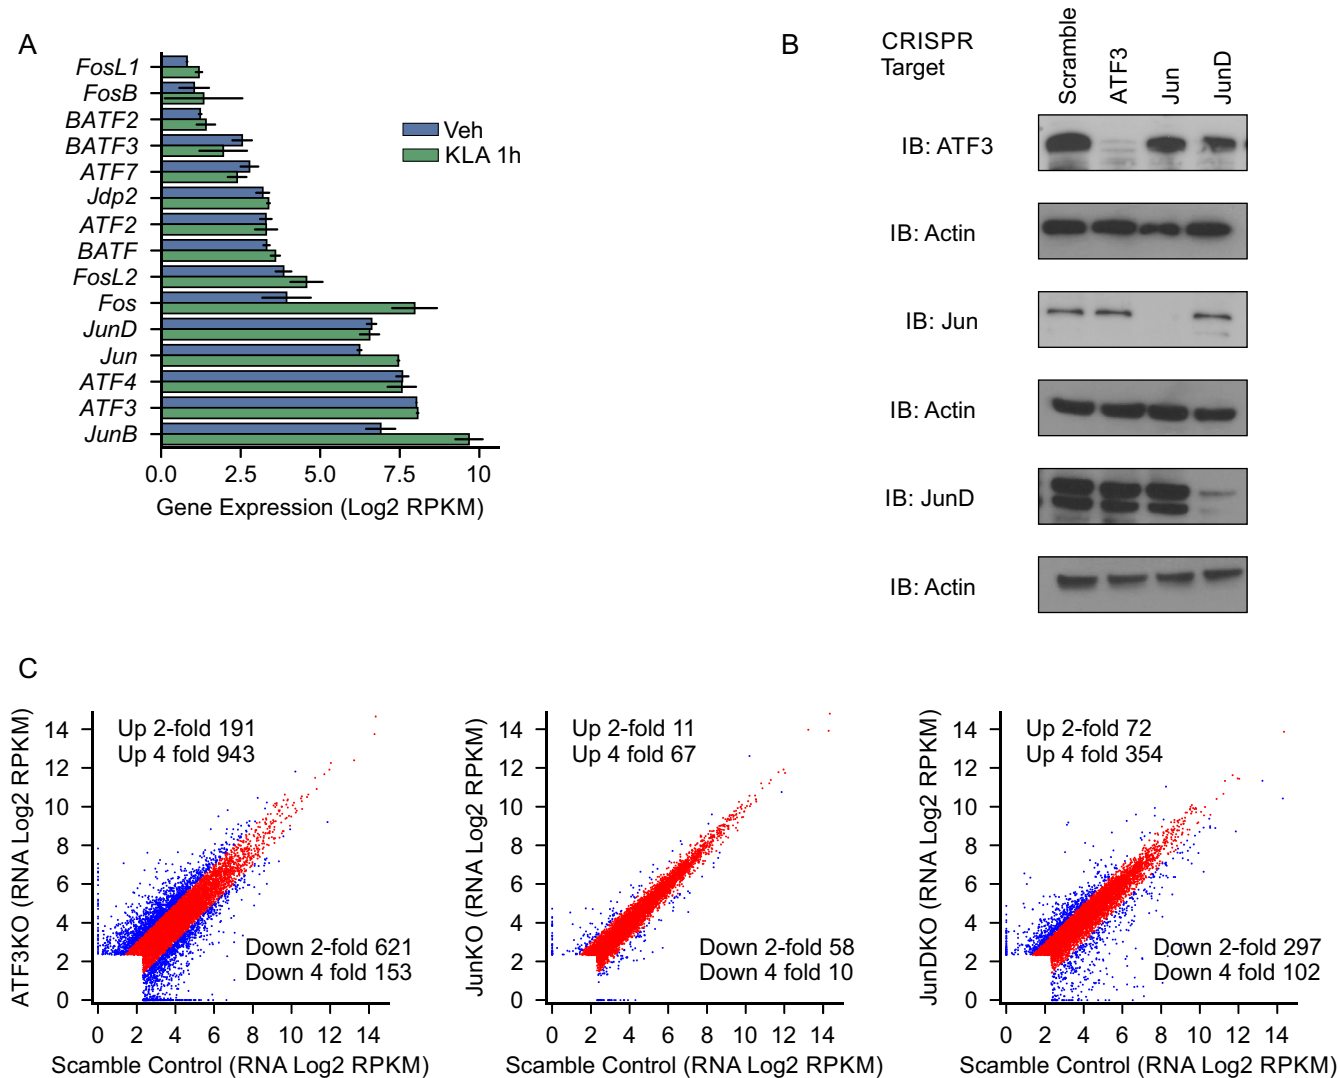

**Supplementary Figure 1.** A genome-wide map of AP-1 activity in macrophages. **A.** mRNA expression of all AP-1 monomers in Vehicle and 1-hour KLA treated TGEMs by RNA-seq. **B.** Western blot analysis of ATF3, Jun and JunD expression in CRISPR mediated knockout of ATF3, Jun and JunD in iBMDM cells. **C.** Scatterplots showing RNA-seq expression between scramble control and CRISPR mediated knockout of ATF3, Jun and JunD.

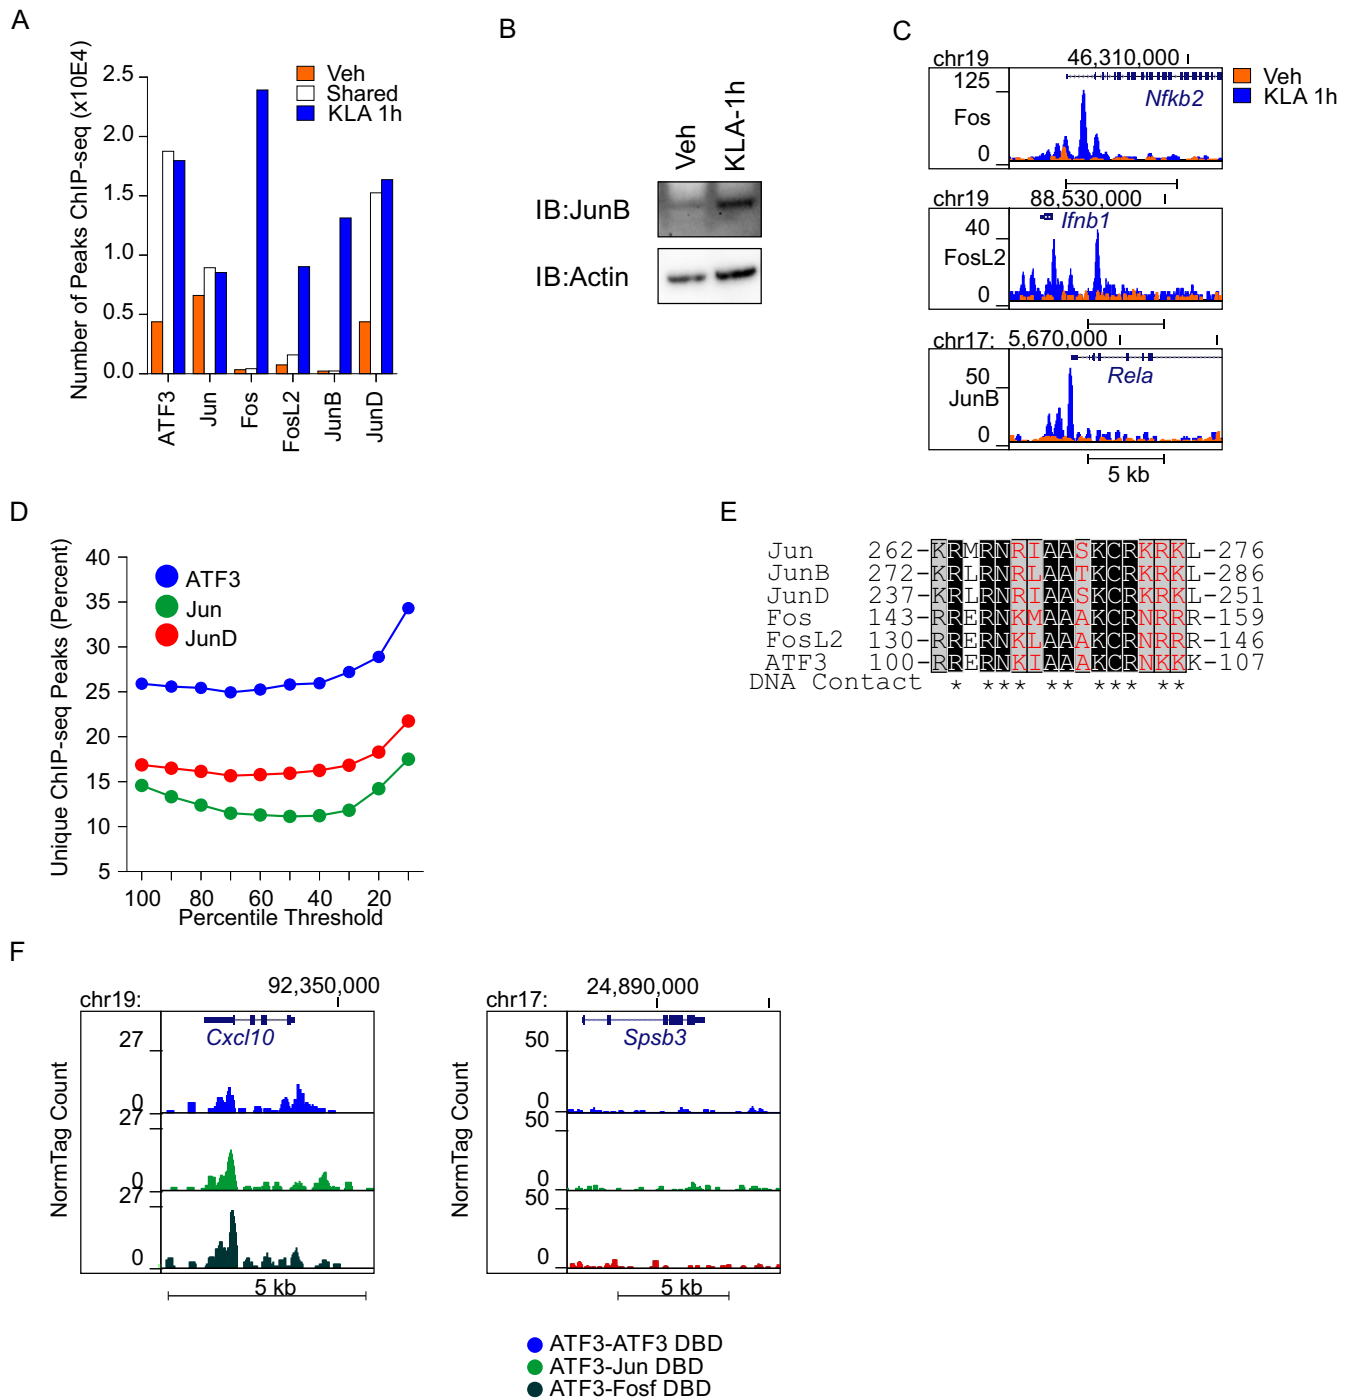

**Supplementary Figure 2.** Extended characterization of AP-1 binding cistrome. **A.** Quantification of the number of binding sites for each monomer that are present in vehicle, 1-hour KLA, or shared in both treatment conditions. **B.** Western blot testing the nuclear protein expression of JunB in Vehicle and KLA-1h treated TGEMs. **C.** Representative browser shots of ChIP-seq peaks for KLA specific monomers Fos (top), FosL2 (middle), and JunB (bottom). **D.** Percent of peaks that are unique to each monomer at different thresholds for the number of reads at each peak. 100 indicates 100% of the peaks and 10 indicates the top 10% of peaks when sorting by the number of reads. **E.** Protein alignment of AP-1 monomer DNA binding domains by Clustal Omega. Black background denotes identity while grey background denotes similar charge. Amino acids involved in DNA binding are indicated by stars. **F.** Representative browser shots of ChIP-seq peaks from ATF3 DNA binding domain chimeras at an ATF3 specific site (left) and Jun specific site (right).

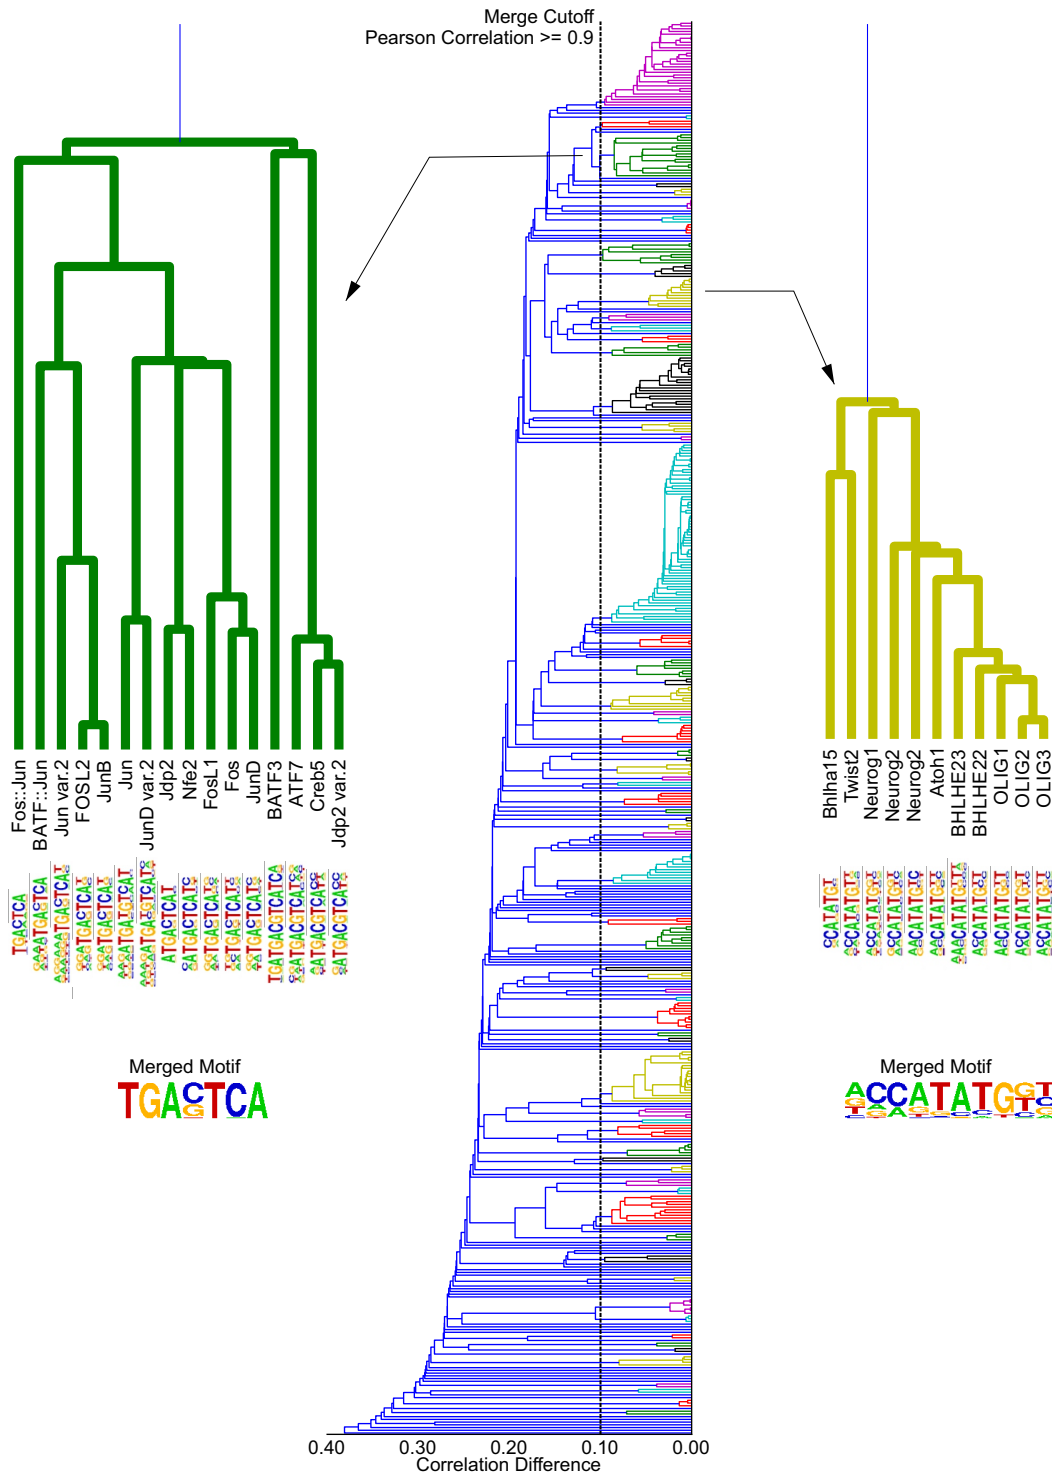

**Supplementary Figure 3.** Curation of the JASPAR motif library to eliminate highly similar motifs. Hierarchical clustering of all motifs in the JASPAR non-redundant library. Colored clades give highly similar motifs (Pearson Correlation  $\geq 0.9$ , indicated by the dotted line) and blue leaf nodes give motifs that are distinct from all other motifs (Pearson Correlation  $< 0.9$ ). Representative clades are indicated on the left and right (with the motif logos indicated).

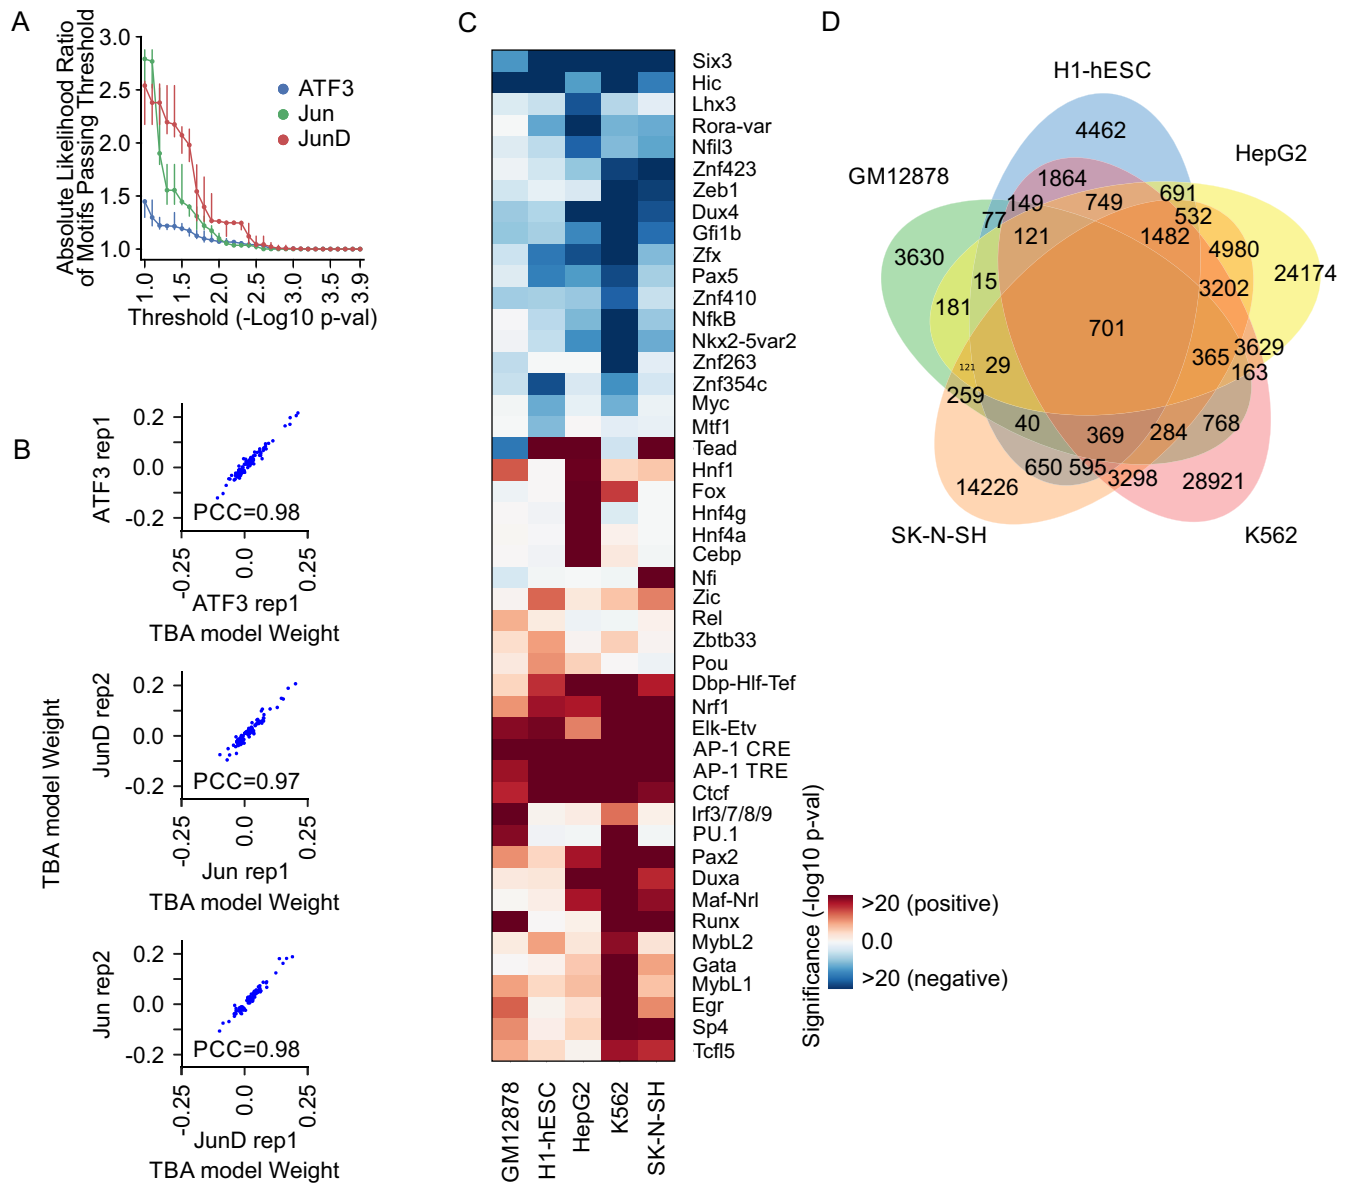

**Supplementary Figure 4.** Characterization of TBA on individual replicate experiments and JunD ChIP-data from different cell lines. **A.** Distribution of the absolute ratio of the likelihood value for each motif that has mean likelihood below the threshold indicated on the horizontal axis, when comparing models trained on individual replicate experiments. Likelihood values for each individual replicate are calculated using the likelihood ratio test, and then averaged across 5 cross validation sets. Error bars indicate the standard deviation. **B.** Comparison of the weights of significant motifs ( $p < 10e-2.5$ ) from TBA models calculated from individual experiments. The similarity of each pair of models, measured by the Pearson correlation coefficient, is annotated in each panel. **C.** Significance values for the 20 most significant motifs for TBA models trained for JunD binding in a several of cell lines. Red hues indicate motifs positively correlated with binding and blue hues indicate motifs negatively correlated with binding. **D.** Overlap of JunD binding sites from various cell lines. Labels indicate the number of binding sites that overlap between a combination of the cell lines.

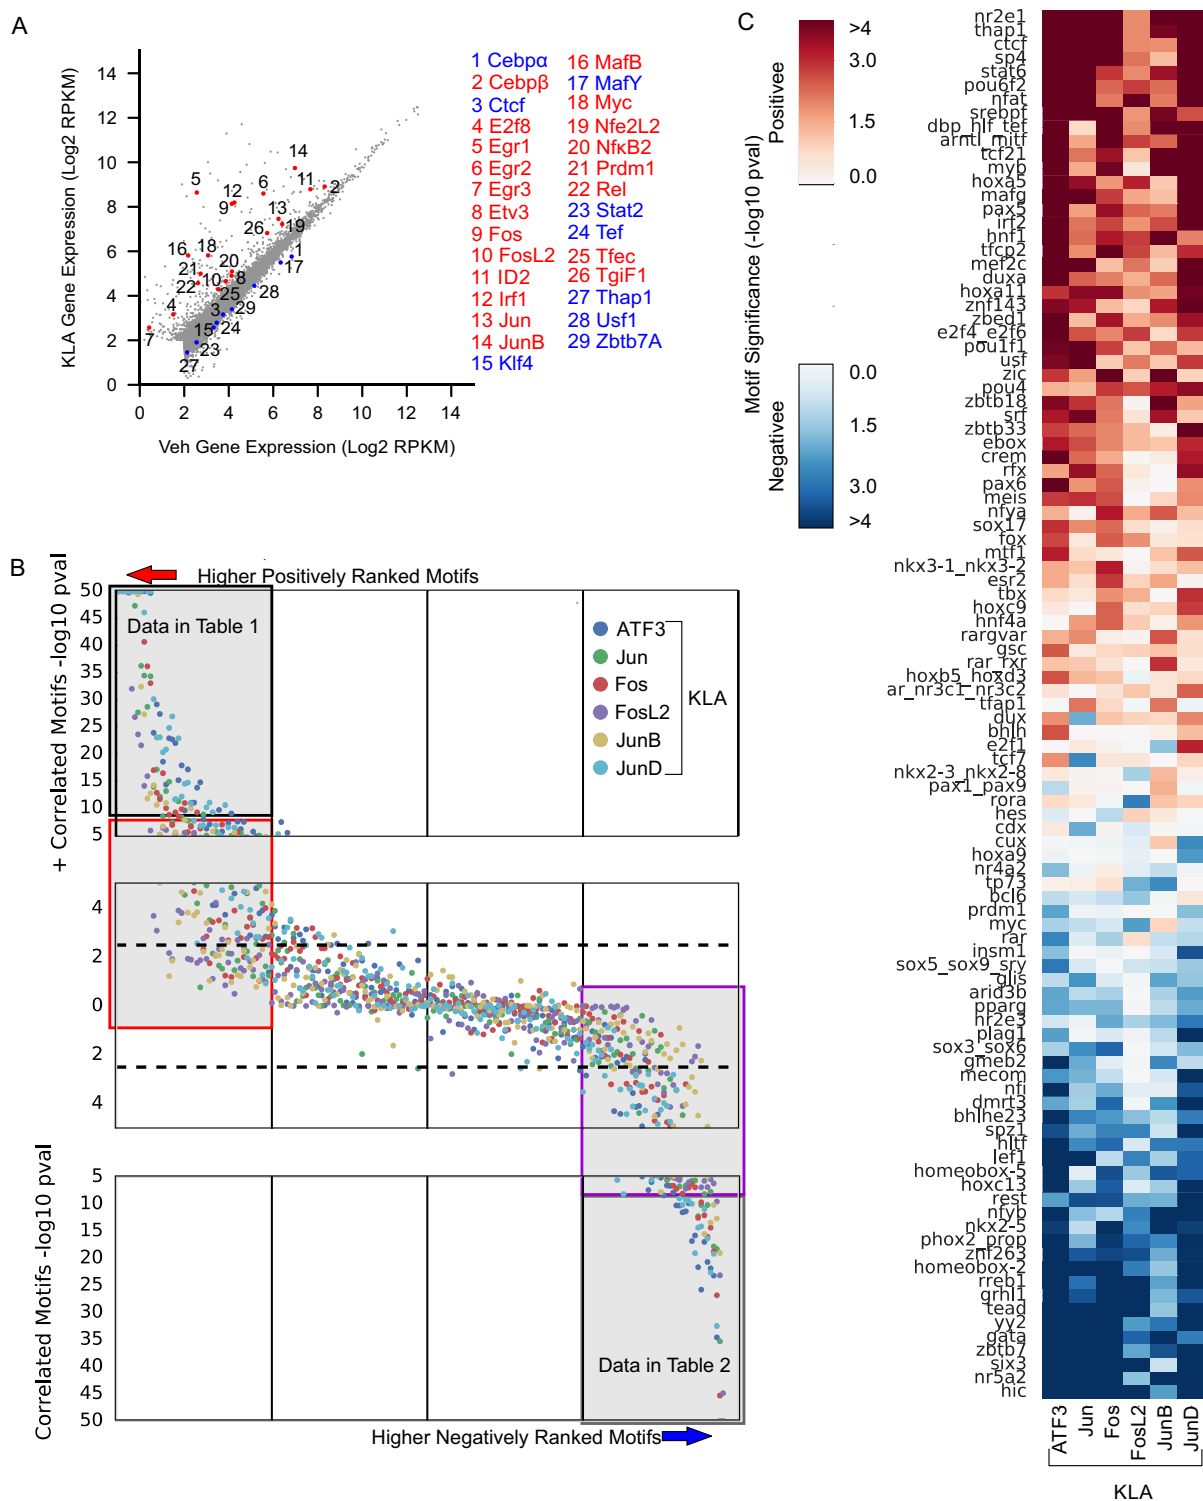

**Supplementary Figure 5.** TBA identifies motifs that coordinate the binding of each AP-1 monomer in KLA-1h treatment. **A.** mRNA expression of transcripts before and after KLA-1h treatment. Differentially expressed (FDR<0.05) factors with known DNA motifs are highlighted in red (up-regulated) and blue (down-regulated), labeled and listed to the right. **B.** DNA motifs rank order based on the significance of the motif according to the likelihood ratio test. **C.** Heatmap representing the negative log10 p-value of each motif that shows a 100 fold likelihood ratio between two monomers when using the likelihood ratio test.

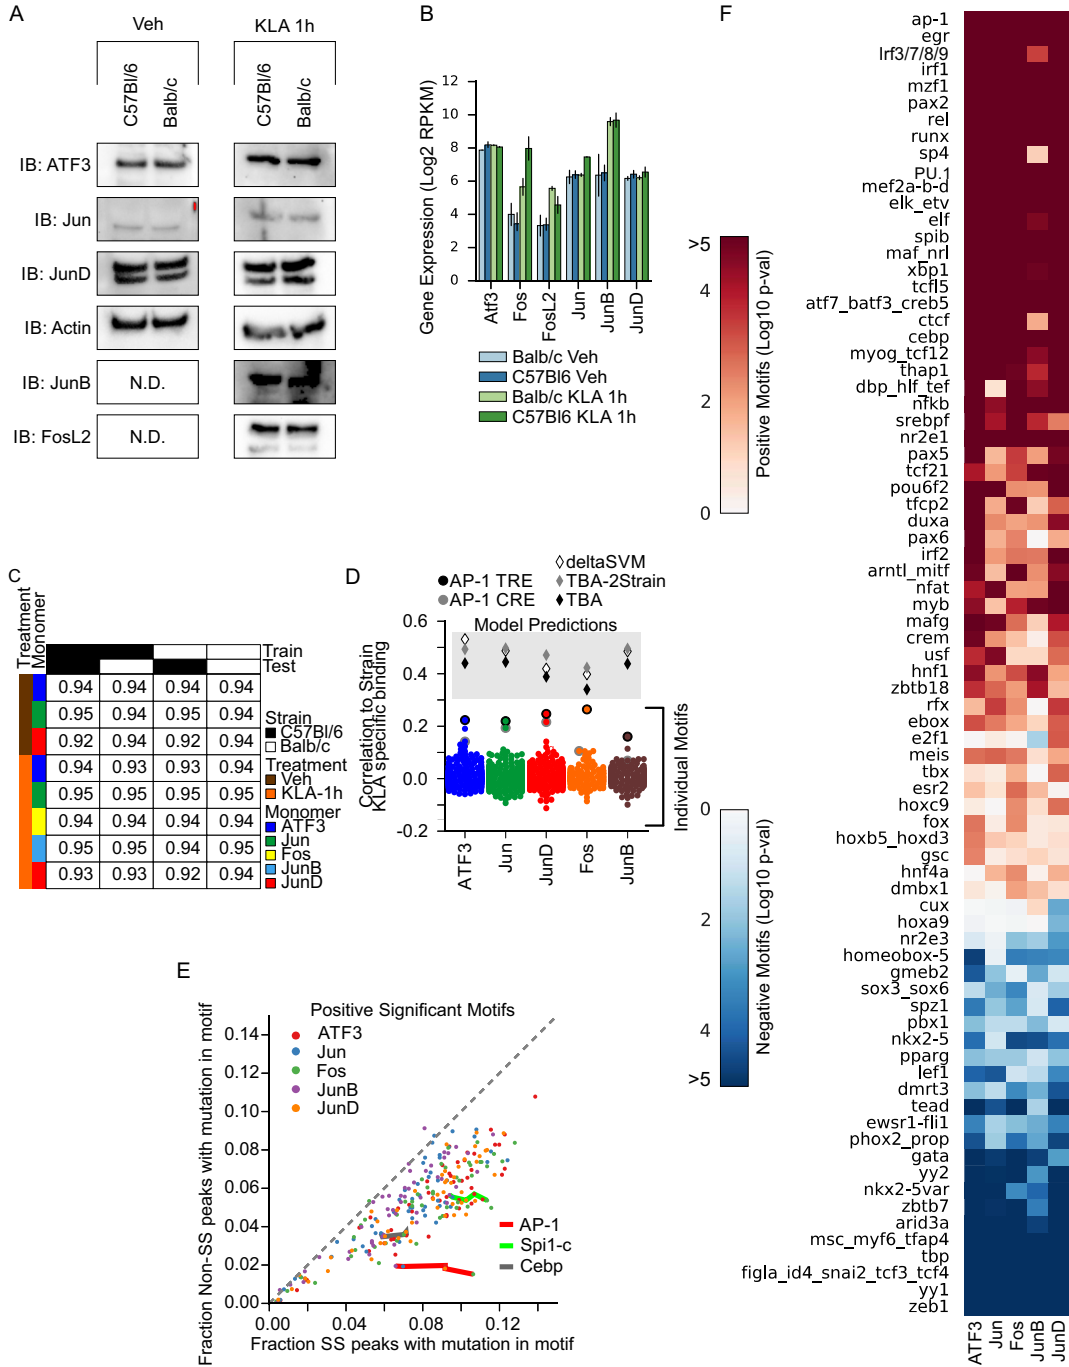

**Supplementary Figure 6.** Leveraging the effects of genetic variation to validate TBA predictions in activated macrophages. **A.** Western blot showing protein expression of AP-1 family members in TGEMs after Veh and one hour KLA treatment using nuclear extracts. **B.** mRNA expression of monomers before and after 1-hour KLA treatment in C57Bl/6J and BALB/cJ. **C.** Model performance when varying the strain of the data used for training and testing the TBA model. TBA was trained on AP-1 monomers in either Veh or KLA and on one strain and tested for predictive ability on either strain. **D.** Predictive performance of various models for predicting strain specific binding of each monomer as measured by the Pearson correlation of a model's predictions versus the log2 fold change in binding between the Balb/cJ and C57Bl/6J at all AP-1 binding in activated, one hour KLA treated, TGEMs. The performance of models that integrate multiple motifs – deltaSVM, TBA, TBA-2Strain, are represented as diamonds. The correlation of the change in an individual motif's score (due to a mutation) to strain specific binding is indicated using round points. **E.** Frequency of mutations in significant motifs (from TBA model,  $p < 10e-2.5$ ) at strain specific versus non-strain specific peaks for each monomer in KLA treated macrophages. **F.** Heatmap of significance values for motifs that intersected between the One Strain and Two Strain model.

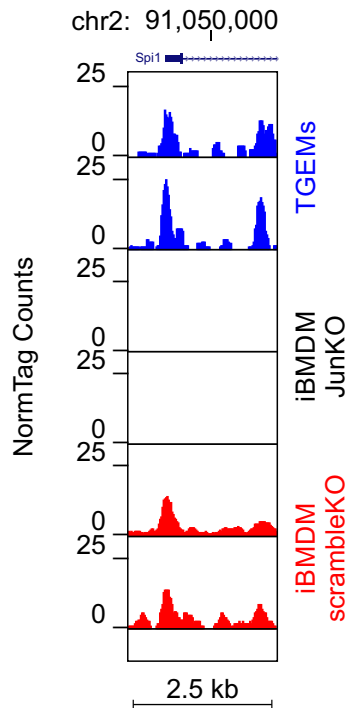

**Supplementary Figure 7.** CRISPR mediated knockout of Jun leads to a drastic reduction in Jun binding by ChIP-seq. ChIP-seq was performed on iBMDM where Jun knockout was performed using CRISPR, leaving 12 peaks in comparison to the 25041 detected in scramble CRISPR treated iBMDMs and 15548 in TGEMs. Representative browser shot for Jun ChIP-seq at the Spi1 locus is shown.

## 2 Supplementary Tables

| <b>Motif</b>     | <b>Mean p-val</b> |
|------------------|-------------------|
| ap-1             | 1.00E-50          |
| cebp             | 1.00E-50          |
| spi1-c           | 1.00E-50          |
| rel              | 1.00E-50          |
| egr              | 1.15E-50          |
| atf7_batf3_creb5 | 1.64E-33          |
| pax2             | 2.76E-28          |
| runx             | 4.26E-25          |
| elk_etv          | 4.48E-23          |
| maf_nrl          | 1.34E-15          |
| irf1             | 2.70E-13          |
| mzf1             | 1.14E-07          |
| tcfl5            | 1.82E-07          |
| spib             | 2.32E-07          |
| xbp1             | 1.39E-06          |
| elf              | 2.77E-06          |

**Supplementary Table 1.** Table of highly significant motifs, positively correlated with binding for all AP-1 monomers in KLA treated TGEMs.

| <b>Motif</b>              | <b>Mean p-val</b> |
|---------------------------|-------------------|
| zeb1                      | 2.20E-46          |
| yy1                       | 1.53E-20          |
| figla_id4_snai2_tcf3_tcf4 | 4.78E-11          |
| onecut                    | 1.04E-07          |
| tbp                       | 3.04E-07          |
| msc_myf6_tfap4            | 6.38E-07          |

**Supplementary Table 2.** Table of highly significant motifs, negatively correlated with binding for all AP-1 monomers in KLA treated TGEMs.



| Reactivity | Description       | Company              | Cat #         |
|------------|-------------------|----------------------|---------------|
| ATF2       | Rabbit polyclonal | Santa Cruz           | sc-187        |
| Atf3       | Rabbit polyclonal | Thermo               | PA5-36244     |
| Atf4       | Rabbit polyclonal | Cell Signaling       | 11815         |
| Atf4       | Rabbit polyclonal | Sigma                | ABE387        |
| Fos        | Rabbit polyclonal | Santa Cruz           | sc-7202       |
| FosL1      | Rabbit polyclonal | Santa Cruz           | sc-605        |
| FosL2      | Mouse monoclonal  | Santa Cruz           | sc-166102     |
| Fosb       | Rabbit polyclonal | Cell Signaling       | 2251          |
| Jun        | Rabbit polyclonal | Santa Cruz           | sc-1694       |
| JunB       | Rabbit polyclonal | Santa Cruz           | sc-73         |
| JunD       | Rabbit polyclonal | Santa Cruz           | sc-74         |
| Jdp2       | Rabbit polyclonal | Thermo               | PA5-19692     |
| Batf       | Rabbit polyclonal | Brookwood Biomedical | PAB4003       |
| Batf2      | Rabbit polyclonal | Santa Cruz           | sc-241891     |
| Batf3      | Rabbit polyclonal | Abnova               | H00055509-M04 |
| CEBPa      | Rabbit polyclonal | Santa Cruz           | sc-61         |
| Pu.1       | Rabbit polyclonal | Santa Cruz           | sc-352        |
| PPARg      | Rabbit polyclonal | Santa Cruz           | sc-7196       |
| PPARg      | Rabbit monoclonal | Cell Signaling       | C26H12        |
| PPARg      | Rabbit polyclonal | Diagenode            | C15410133     |

**Supplementary Table 3.** A List of Antibodies used in this study.

| Target         | Guide Sequence         | Source     |
|----------------|------------------------|------------|
| ATF3-mouse     | GTCAAATACCAGTGACCCAGG  | This study |
| ATF3-mouse     | GCTTGGTGA CTGACATCTCCA | This study |
| Jun-mouse      | gcttcccagtgtcacctccg   | This study |
| Jun-mouse      | GCTCTCGGACTGGAGGAACGG  | This study |
| JunD-mouse     | gctcaggttgccgtagaccg   | This study |
| JunD-mouse     | gccgagtctcgaagagtccg   | This study |
| Scramble-mouse | GCACTACCAGAGCTAACTCA   | This study |

**Supplementary Table 4.** Guide RNAs used for CRISPR experiments
