# Supplementary material for: Diverse motif ensembles specify non-redundant DNA binding activities of AP-1 family members in macrophages
Source: PubMed Central journal article supplement (PMC6345992; doi:10.1038/s41467-018-08236-0), 2019-01-24
Supplement: 41467_2018_8236_MOESM2_ESM.pdf [file 41467_2018_8236_MOESM2_ESM.pdf]

## Description of Additional Supplementary Files

File Name: Supplementary Data 1

Description: Source Data
